# Supplementary material
Source: HighWire-hosted journal article supplement (https://cmaj.ca/highwire/filestream/81281/field_highwire_adjunct_files/2/211881-res-3-at.pdf)
Supplement: 211881-res-3-at.pdf [file 211881-res-3-at.pdf]

**Supplementary Appendix 3:** Clinical characteristics of 126 hemodialysis patients receiving the BNT162b2 or mRNA-1273 COVID-19 vaccine with serology at both 6-7 weeks and 12 weeks

| Characteristic                           | No. (%) of hemodialysis patients* |                   | p value |
|------------------------------------------|-----------------------------------|-------------------|---------|
|                                          | BNT162b2<br>n=63                  | mRNA-1273<br>n=63 |         |
| Age, yr; median (IQR)                    | 73 (64-81)                        | 59 (54-67)        | <0.001  |
| Male sex                                 | 36 (57.1%)                        | 43 (68.3%)        | 0.2     |
| Previous COVID-19 <sup>†</sup>           | 3 (4.8%)                          | 4 (6.3%)          | 0.7     |
| <b>Comorbidity</b>                       |                                   |                   |         |
| Prior solid-organ transplant             | 0 (0%)                            | 16 (25.4%)        | <0.001  |
| Immunosuppressive treatment <sup>‡</sup> | 3 (4.8%)                          | 12 (19.0%)        | 0.013   |
| Diabetes mellitus                        | 39 (61.9%)                        | 22 (34.9%)        | 0.002   |
| Coronary artery disease                  | 28 (44.4%)                        | 10 (15.9%)        | <0.001  |
| Congestive heart failure                 | 19 (30.2%)                        | 14 (22.2%)        | 0.3     |
| Cerebrovascular disease                  | 13 (20.6%)                        | 5 (7.9%)          | 0.04    |
| Hypertension                             | 58 (92.1%)                        | 54 (85.7%)        | 0.26    |

Note: COVID-19=coronavirus-19, IQR=interquartile range.

\*Unless stated otherwise.

<sup>†</sup>Confirmed by reverse-transcription-polymerase chain reaction at study enrollment.

<sup>‡</sup>Defined as taking any of the following: antimetabolite agent, calcineurin inhibitor, cytotoxic medications, rituximab in prior 6 months, tumor necrosis factor alpha monoclonal antibodies, glucocorticoids at a dosage of more than prednisone 5 mg daily, or active chemotherapy.
